# Supplementary material
Source: publisher site journal article supplement (https://www.dovepress.com/article/422969)
Supplement: Supplementary file 1 [file get_supplementary_file.php]

## Supplementary Material 1. Sample size calculation in conventional method

Assuming a live birth rate of 30% during the CNY season and 45% during the non-CNY season, given an α (Type I error) of 0.05 and a β (Type II error) of 0.2, the required sample size for each group is 160.

## Table S1. Data of live birth for Non Winter Season and CNY

|  |  | n(%) |
| --- | --- | --- |
| Implementation season |  |  |
|  | *Non Winter Season (Mar.-Oct.)* | 1605(43.51%) |
|  | *CNY Holiday Season (Jan.-Feb.)* | 77(32.22%) |

## Table S2. Multivariate logistic analysis for participants implementation

|  |  | OR(95%CI) | P-value |
| --- | --- | --- | --- |
| Age | *≤35* | Ref. |  |
|  | *>35* | 0.46(0.37, 0.56) | <0.001 |
| FSH | *≤10* | Ref. |  |
|  | *>10* | 1.00(0.83, 1.21) | 0.979 |
| E2 | *≤55* | Ref. |  |
|  | *>55* | 0.87(0.75, 1.01) | 0.065 |
| T | *≤0.45* | Ref. |  |
|  | *>0.45* | 1.08(0.95, 1.23) | 0.260 |
| AMH | *≤3* | Ref. |  |
|  | *>3* | 1.10(0.95, 1.28) | 0.185 |
| Reason of infertility | *Primary* | Ref. |  |
|  | *Secondary* | 1.04(0.91, 1.19) | 0.573 |
| Implementation season | *Non Winter Season (Mar.-Oct.)* | Ref. |  |
|  | *CNY Holiday Season (Jan.-Feb.)* | 0.62(0.47, 0.82) | 0.001 |
| Number of oocytes | *0-5* | Ref. |  |
|  | *6-10* | 1.53(1.26, 1.85) | <0.001 |
|  | *11-15* | 1.73(1.40, 2.13) | <0.001 |
|  | *16 and more* | 1.55(1.22, 1.97)) | <0.001 |

## Table S3. IPTW data set for basic characteristics

|  |  | Non-CNY Season  (n=4688.03) | CNY Season  (n=4614.19) | p-value | SMD |
| --- | --- | --- | --- | --- | --- |
| Age | *mean (SD)* | 30.89 (4.46) | 31.13 (4.54) | 0.457 | 0.052 |
| Infertility years | *≤5 year* | 3831.2 (81.7%) | 3725.0 (80.7%) | 0.403 | 0.099 |
|  | *5~10 years* | 745.5 (15.9%) | 831.7 (18.0%) |  |  |
|  | *>10 year* | 111.3 ( 2.4%) | 57.5 ( 1.2%) |  |  |
| Education | *≤6 years* | 141.0 ( 3.0%) | 120.0 ( 2.6%) | 0.837 | 0.067 |
|  | *6-9 years* | 1484.8 (31.7%) | 1373.1 (29.8%) |  |  |
|  | *9~12 years* | 901.8 (19.2%) | 844.7 (18.3%) |  |  |
|  | *>12 year* | 2160.4 (46.1%) | 2276.4 (49.3%) |  |  |
| FSH | *Median(IQR)* | 7.52 (6.35, 8.95) | 7.53 (6.36, 9.21) | 0.801# | 0.012 |
| E2 | *Median(IQR)* | 40.00 (27.00, 58.00) | 40.00 (25.00, 55.00) | 0.343# | 0.013 |
| P | *Median(IQR)* | 0.60 (0.37, 0.90) | 0.61 (0.39, 0.91) | 0.616# | 0.085 |
| PRL | *Median(IQR)* | 12.50 (9.23, 17.26) | 12.38 (9.20, 16.93) | 0.722# | 0.032 |
| LH | *Median(IQR)* | 4.42 (3.24, 6.21) | 4.45 (3.16, 5.72) | 0.464# | 0.029 |
| T | *Median(IQR)* | 0.44 (0.32, 0.56) | 0.43 (0.31, 0.56) | 0.979# | 0.008 |
| AMH | *Median(IQR)* | 2.59 (1.56, 4.01) | 2.53 (1.55, 3.56) | 0.309# | 0.075 |
| Classification of infertility | *Primary* | 2359.9 (50.3%) | 2228.7 (48.3%) | 0.575 | 0.041 |
|  | *Secondary* | 2328.1 (49.7%) | 2385.4 (51.7%) |  |  |

# Mann-Whitney test
